# Supplementary material
Source: publisher figshare collection journal article supplement (https://acs.figshare.com/ndownloader/files/31634476)
Supplement: Supplementary file 1 [file 31634476]

## Sheet: Sheet1
Abbreviation	Name	Gene ID
S100a4	S100 calcium binding protein A4	ENSMUSG00000001020
S100a6	S100 calcium binding protein A6 (calcyclin)	ENSMUSG00000001025
Cfp	complement factor properdin	ENSMUSG00000001128
Col1a1	collagen, type I, alpha 1	ENSMUSG00000001506
Spi1	spleen focus forming virus (SFFV) proviral integration oncogene	ENSMUSG00000002111
Actn3	actinin alpha 3	ENSMUSG00000006457
Ccl8	chemokine (C-C motif) ligand 8	ENSMUSG00000009185
Rarres2	retinoic acid receptor responder (tazarotene induced) 2	ENSMUSG00000009281
Adssl1	adenylosuccinate synthetase like 1	ENSMUSG00000011148
Cybb	cytochrome b-245, beta polypeptide	ENSMUSG00000015340
Gzmb	granzyme B	ENSMUSG00000015437
Gzmf	granzyme F	ENSMUSG00000015441
Lbp	lipopolysaccharide binding protein	ENSMUSG00000016024
Eef1a2	eukaryotic translation elongation factor 1 alpha 2	ENSMUSG00000016349
Krt27	keratin 27	ENSMUSG00000017588
Etv4	ets variant 4	ENSMUSG00000017724
Gpx3	glutathione peroxidase 3	ENSMUSG00000018339
Slc13a3	solute carrier family 13 (sodium-dependent dicarboxylate transporter), member 3	ENSMUSG00000018459
Ccl6	chemokine (C-C motif) ligand 6	ENSMUSG00000018927
Ccl9	chemokine (C-C motif) ligand 9	ENSMUSG00000019122
Dcn	decorin	ENSMUSG00000019929
Aoah	acyloxyacyl hydrolase	ENSMUSG00000021322
Nckap1l	NCK associated protein 1 like	ENSMUSG00000022488
Ciita	class II transactivator	ENSMUSG00000022504
Apod	apolipoprotein D	ENSMUSG00000022548
Krtap15	keratin associated protein 15	ENSMUSG00000022931
Krt6b	keratin 6B	ENSMUSG00000023041
Ache	acetylcholinesterase	ENSMUSG00000023328
Prph	peripherin	ENSMUSG00000023484
Pla2g7	phospholipase A2, group VII (platelet-activating factor acetylhydrolase, plasma)	ENSMUSG00000023913
Xdh	xanthine dehydrogenase	ENSMUSG00000024066
Psmb8	proteasome (prosome, macropain) subunit, beta type 8 (large multifunctional peptidase 7)	ENSMUSG00000024338
Csf1r	colony stimulating factor 1 receptor	ENSMUSG00000024621
Ms4a6b	membrane-spanning 4-domains, subfamily A, member 6B	ENSMUSG00000024677
Ms4a6d	membrane-spanning 4-domains, subfamily A, member 6D	ENSMUSG00000024679
Msr1	macrophage scavenger receptor 1	ENSMUSG00000025044
Sdc3	syndecan 3	ENSMUSG00000025743
Hk3	hexokinase 3	ENSMUSG00000025877
Col3a1	collagen, type III, alpha 1	ENSMUSG00000026043
Marco	macrophage receptor with collagenous structure	ENSMUSG00000026390
Hypk	huntingtin interacting protein K	ENSMUSG00000027245
Siglec1	sialic acid binding Ig-like lectin 1, sialoadhesin	ENSMUSG00000027322
Zbp1	Z-DNA binding protein 1	ENSMUSG00000027514
Ccn5	cellular communication network factor 5	ENSMUSG00000027656
Ptgfrn	prostaglandin F2 receptor negative regulator	ENSMUSG00000027864
Gbp3	guanylate binding protein 3	ENSMUSG00000028268
Gbp2	guanylate binding protein 2	ENSMUSG00000028270
Epha7	Eph receptor A7	ENSMUSG00000028289
Tnc	tenascin C	ENSMUSG00000028364
Bst1	bone marrow stromal cell antigen 1	ENSMUSG00000029082
Cxcl9	chemokine (C-X-C motif) ligand 9	ENSMUSG00000029417
Oasl2	2'-5' oligoadenylate synthetase-like 2	ENSMUSG00000029561
Col1a2	collagen, type I, alpha 2	ENSMUSG00000029661
Mfap5	microfibrillar associated protein 5	ENSMUSG00000030116
Tyrobp	TYRO protein tyrosine kinase binding protein	ENSMUSG00000030579
Klk7	kallikrein related-peptidase 7 (chymotryptic, stratum corneum)	ENSMUSG00000030713
Il4ra	interleukin 4 receptor, alpha	ENSMUSG00000030748
Itgam	integrin alpha M	ENSMUSG00000030786
Trim30a	tripartite motif-containing 30A	ENSMUSG00000030921
Crispld2	cysteine-rich secretory protein LCCL domain containing 2	ENSMUSG00000031825
Acta1	actin, alpha 1, skeletal muscle	ENSMUSG00000031972
Loxl1	lysyl oxidase-like 1	ENSMUSG00000032334
Ctsh	cathepsin H	ENSMUSG00000032359
Rac2	Rac family small GTPase 2	ENSMUSG00000033220
Asprv1	aspartic peptidase, retroviral-like 1	ENSMUSG00000033508
Calm4	calmodulin 4	ENSMUSG00000033765
Tpsb2	tryptase beta 2	ENSMUSG00000033825
Tgfbi	transforming growth factor, beta induced	ENSMUSG00000035493
Krt17	keratin 17	ENSMUSG00000035557
Krt25	keratin 25	ENSMUSG00000035831
C1qb	complement component 1, q subcomponent, beta polypeptide	ENSMUSG00000036905
H2-DMa	histocompatibility 2, class II, locus DMa	ENSMUSG00000037649
Tgm2	transglutaminase 2, C polypeptide	ENSMUSG00000037820
Ctss	cathepsin S	ENSMUSG00000038642
Batf2	basic leucine zipper transcription factor, ATF-like 2	ENSMUSG00000039699
Ifi203	interferon activated gene 203	ENSMUSG00000039997
Gbp7	guanylate binding protein 7	ENSMUSG00000040253
Chil3	chitinase-like 3	ENSMUSG00000040809
Serpina3g	serine (or cysteine) peptidase inhibitor, clade A, member 3G	ENSMUSG00000041481
S100a14	S100 calcium binding protein A14	ENSMUSG00000042306
Apobr	apolipoprotein B receptor	ENSMUSG00000042759
Dok7	docking protein 7	ENSMUSG00000044716
Krt14	keratin 14	ENSMUSG00000045545
Gm12185	predicted gene 12185	ENSMUSG00000048852
Yjefn3	YjeF N-terminal domain containing 3	ENSMUSG00000048967
Clec4a1	C-type lectin domain family 4, member a1	ENSMUSG00000049037
Mmp12	matrix metallopeptidase 12	ENSMUSG00000049723
Arl4c	ADP-ribosylation factor-like 4C	ENSMUSG00000049866
Sprr1a	small proline-rich protein 1A	ENSMUSG00000050359
Mmp13	matrix metallopeptidase 13	ENSMUSG00000050578
Krt71	keratin 71	ENSMUSG00000051879
Rgs14	regulator of G-protein signaling 14	ENSMUSG00000052087
Krt16	keratin 16	ENSMUSG00000053797
Iigp1	interferon inducible GTPase 1	ENSMUSG00000054072
Stfa3	stefin A3	ENSMUSG00000054905
Prr9	proline rich 9	ENSMUSG00000056270
Myh1	apolipoprotein Dmyosin, heavy polypeptide 1, skeletal muscle, adult	ENSMUSG00000056328
Krtap7-1	keratin associated protein 7-1	ENSMUSG00000056706
Tmem140	transmembrane protein 140	ENSMUSG00000057137
Apol9a	apolipoprotein L 9a	ENSMUSG00000057346
Krt6a	keratin 6A	ENSMUSG00000058354
Fcer1g	Fc receptor, IgE, high affinity I, gamma polypeptide	ENSMUSG00000058715
Pirb	paired Ig-like receptor B	ENSMUSG00000058818
Fcgr4	Fc receptor, IgG, low affinity IV	ENSMUSG00000059089
Fcgr3	Fc receptor, IgG, low affinity III	ENSMUSG00000059498
Krtap8-1	keratin associated protein 8-1	ENSMUSG00000059632
Alox5ap	arachidonate 5-lipoxygenase activating protein	ENSMUSG00000060063
H2-Q7	histocompatibility 2, Q region locus 7	ENSMUSG00000060550
H2-Eb1	histocompatibility 2, class II antigen E beta	ENSMUSG00000060586
Dmkn	dermokine	ENSMUSG00000060962
Haghl	hydroxyacylglutathione hydrolase-like	ENSMUSG00000061046
Myl1	myosin, light polypeptide 1	ENSMUSG00000061816
Sphk1	sphingosine kinase 1	ENSMUSG00000061878
Fbln2	fibulin 2	ENSMUSG00000064080
Gm10229	predicted gene 10229	ENSMUSG00000068075
Phf11d	PHD finger protein 11D	ENSMUSG00000068245
Apol9b	apolipoprotein L 9b	ENSMUSG00000068246
Lyz2	lysozyme 2	ENSMUSG00000069516
Irgm2	immunity-related GTPase family M member 2	ENSMUSG00000069874
Cstdc5	cystatin domain containing 5	ENSMUSG00000071561
Slfn2	schlafen 2	ENSMUSG00000072620
Nlrc5	NLR family, CARD domain containing 5	ENSMUSG00000074151
Krtdap	keratinocyte differentiation associated protein	ENSMUSG00000074199
Mafb	v-maf musculoaponeurotic fibrosarcoma oncogene family, protein B (avian)	ENSMUSG00000074622
Ly6a	lymphocyte antigen 6 complex, locus A	ENSMUSG00000075602
Igtp	interferon gamma induced GTPase	ENSMUSG00000078853
Ifi47	interferon gamma inducible protein 47	ENSMUSG00000078920
Tgtp2	T cell specific GTPase 2	ENSMUSG00000078921
Tgtp1	T cell specific GTPase 1	ENSMUSG00000078922
Ifi27l2a	interferon, alpha-inducible protein 27 like 2A	ENSMUSG00000079017
Gbp4	guanylate binding protein 4	ENSMUSG00000079363
Ms4a6c	membrane-spanning 4-domains, subfamily A, member 6C	ENSMUSG00000079419
Kcnj13	potassium inwardly-rectifying channel, subfamily J, member 13	ENSMUSG00000079436
Cfb	complement factor B	ENSMUSG00000090231
Mndal	myeloid nuclear differentiation antigen like	ENSMUSG00000090272
Gm20503	predicted gene 20503	ENSMUSG00000092345
Psmb9	proteasome (prosome, macropain) subunit, beta type 9 (large multifunctional peptidase 2)	ENSMUSG00000096727
Gm28048	predicted gene, 28048	ENSMUSG00000098650
Gbp6	guanylate binding protein 6	ENSMUSG00000104713
Gbp10	guanylate-binding protein 10	ENSMUSG00000105096
Gbp5	guanylate binding protein 5	ENSMUSG00000105504

## Sheet: Sheet2
					gene_ID	sampleA	sampleB	log2FC	PValue	FDR	A	B	C	D	E	F	G	H
Tgtp1	T cell specific GTPase 1				ENSMUSG00000078922	S1	S2	-3.92155	2.02968e-56	2.32094e-52	1.407	1.91	26.132	24.131	3.075	1.155	1.757	194.988
					ENSMUSG00000078922	S2	S3	3.57077	5.68514e-25	1.62126e-21	1.407	1.91	26.132	24.131	3.075	1.155	1.757	194.988
Tgtp2	T cell specific GTPase 2				ENSMUSG00000078921	S2	S3	2.42691	2.11463e-22	4.02026e-19	2.52	4.675	38.602	29.266	5.681	6.94	5.65	210.371
					ENSMUSG00000078921	S1	S2	-3.23766	5.42276e-32	1.24019e-28	2.52	4.675	38.602	29.266	5.681	6.94	5.65	210.371
Irgm2	immunity-related GTPase family M member 2				ENSMUSG00000069874	S1	S2	-2.35064	4.89945e-20	4.66876e-17	3.594	6.158	26.933	22.807	7.257	12.969	7.266	141.06
Loxl1	lysyl oxidase-like 1				ENSMUSG00000032334	S1	S3	2.44267	4.35e-07	7.46e-05	4.579	2.608	5.333	2.253	0.689	0.633	8.734	5.804
					ENSMUSG00000032334	S2	S3	2.52062	2.433e-06	0.000334377	4.579	2.608	5.333	2.253	0.689	0.633	8.734	5.804
					ENSMUSG00000032334	S3	S4	-3.45903	9.069e-11	6.51154e-08	4.579	2.608	5.333	2.253	0.689	0.633	8.734	5.804
Gpx3	glutathione peroxidase 3
